# Supplementary material for: Tracheostomy procedures in the intensive care unit: an international survey
Source: PubMed Central journal article supplement (PMC4536803; doi:10.1186/s13054-015-1013-7), 2015-08-13

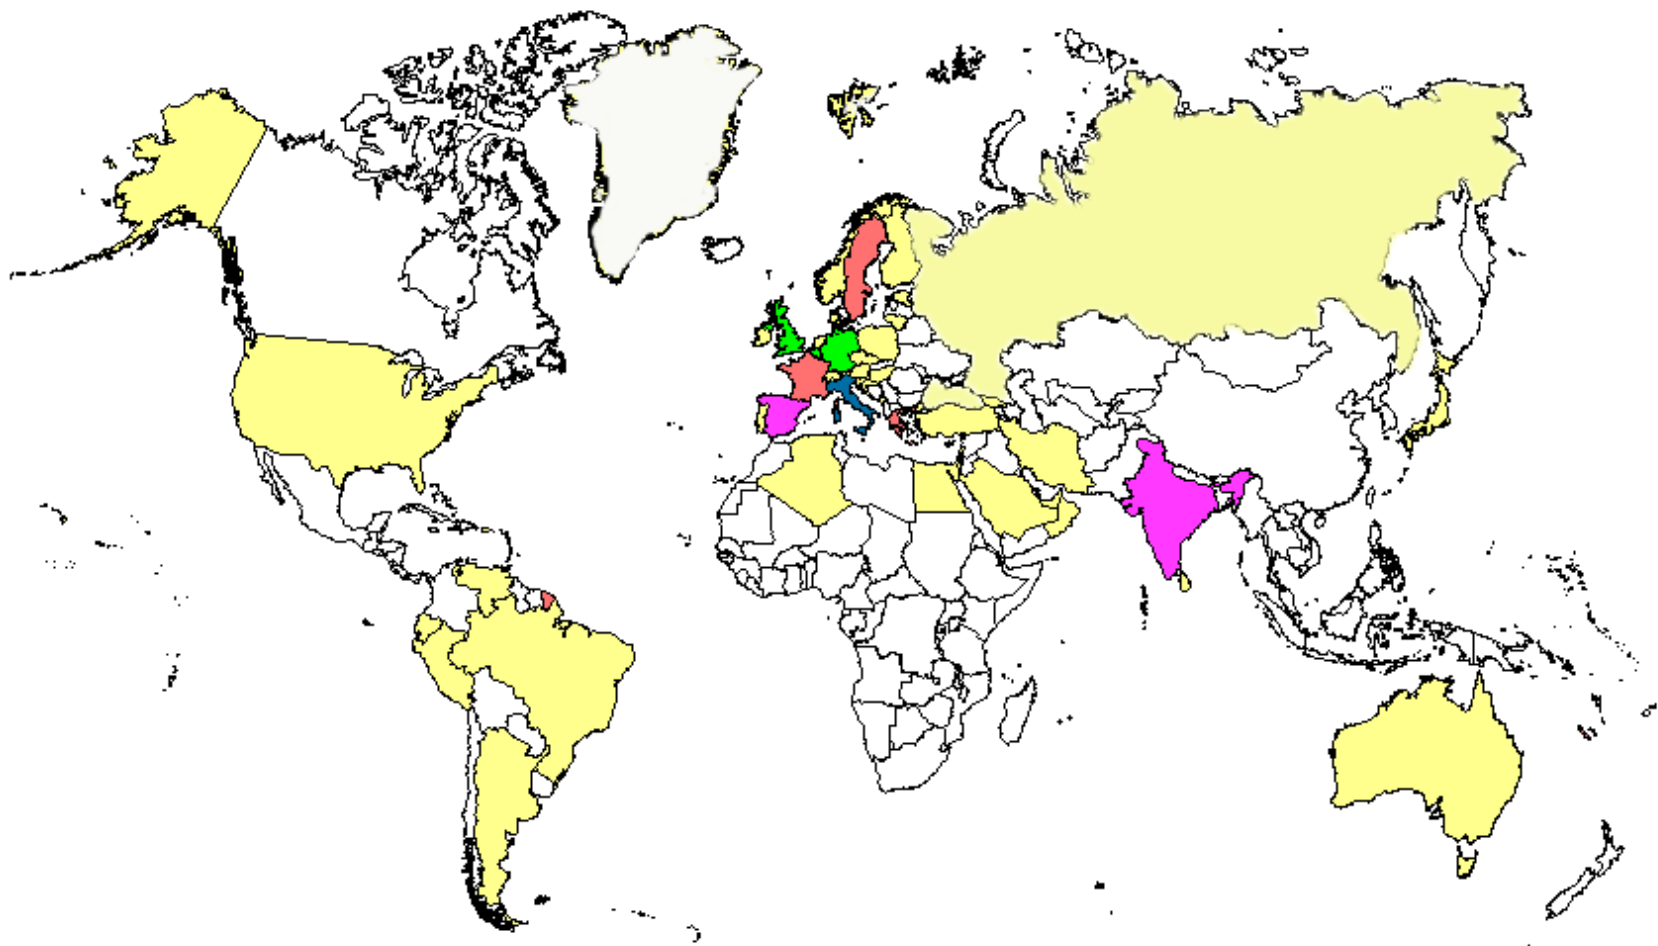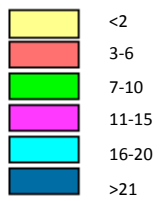

Supplement: 13054_2015_1013_MOESM2_ESM.pdf [file 13054_2015_1013_MOESM2_ESM.pdf]
